# Supplementary material for: From Western Asia to the Mediterranean Basin: Diversification of the Widespread Euphorbia nicaeensis Alliance (Euphorbiaceae)
Source: Front Plant Sci. 2022 Jun 23;13:815379. doi: 10.3389/fpls.2022.815379 (PMC9262032; doi:10.3389/fpls.2022.815379)
Supplement: Supplementary file 1 [file Table_1.xlsx]

## Sheet: Supplementary_Table_1
From western Asia to the Mediterranean Basin: diversification of the widespread Euphorbia nicaeensis alliance (Euphorbiaceae)
VALENTINA STOJILKOVIČ1,2, ELIŠKA ZÁVESKÁ, BOŽO FRAJMAN2*
¹Department of Biology, Biotechnical Faculty, University of Ljubljana, Večna pot 111, 1000 Ljubljana, Slovenia
²Department of Botany, University of Innsbruck, Sternwartestraße 15, A-6020 Innsbruck, Austria.
³Department of Systematic and Evolutionary Botany, University of Vienna, Vienna A-1030, Austria
* Correspondence: Božo Frajman: bozo.frajman@uibk.ac.at
Supplementary Table 1: Studied populations of the Euphorbia nicaeensis alliance and outgroup taxa including voucher data, RGS mean values and standard deviations (SD) as well as number of individuals analysed, Genbank numbers of ITS sequences, number of individuals per population used in RADseq and different morphometric analyses.
ID	Lab number	Taxon (revised taxonomy)	Taxon (previous taxonomy)	Country	Locality	Elevation [m]	Longitude	Latitude	Date	Collector	Herbarium	Collection/Herbarium number	Lab number	RGS (Mean)	RGS (SD)	RGS (Nr. of Individuals/Measurements)	ITS (GenBank)	Morphometry (vegetative, cyathium)	Morphometry (fruit)	Morphometry (seed)	RAD-seq
1	14677	Euphorbia nicaeensis	Euphorbia nicaeensis	Morocco	Distrito de Beni-Mellal, en el puerto de Tizi-n-Nissi	2590	-6.18833	31.8172	3.7.2006	Medina	MA	MA-01-00746425	14677				OL640170
2	14676	Euphorbia nicaeensis	Euphorbia nicaeensis	Morocco	Er Rachidia: Between Ouaourioud and Imilchil, 9 km of Imilchil	2320	-5.66028	32.2069	5.7.2008	Portilheiro	MA	MA-01-00819394	14676				OL640169
3	15255	Euphorbia nicaeensis	Euphorbia nicaeensis	Morocco	Meknès-Tafilalet: NE margin of the village Itzer	1646	-5.04056	32.8828	17.06.2018	J. Molero & J. M. Montserrat	BCN	J. Molero 57/2018	15255	1.48755	0.00656405	3					2
4	13913	Euphorbia nicaeensis	Euphorbia nicaeensis	Morocco	Meknès-Tafilalt: along road from Midelt to Timahdite, 0.6 km SE Ait-Oufella	1730	-5.04861	32.9278	2.6.2010	A. Hilpold	IB	AH20103077	13913				OL640164	1
5	15256	Euphorbia nicaeensis	Euphorbia nicaeensis	Morocco	Meknès-Tafilalet: 4 km N of the village Timahdte (between Azrou and Midelt)	1834	-5.07361	33.2719	17.06.2018	J. Molero & J. M. Montserrat	BCN	J. Molero 58/2018	15256	1.50364	0.0235165	3
6	14679	Euphorbia nicaeensis	Euphorbia nicaeensis	Morocco	Ksar-es-Souk: Middle Atlas, base of djbel Hebri	2100	-4.82889	33.2947	21.6.1994	Blanch	MA	MA-01-00579305	14679				OL640172
7	12504	Euphorbia nicaeensis	Euphorbia nicaeensis	Portugal	Setubal: Serra da Arrabida	67	-8.96972	38.5011	27.4.2008	P. Escobar García	IB	12504	12504	1.38468		1	OL640157	1
8	12517	Euphorbia nicaeensis	Euphorbia nicaeensis	Spain	Cadiz: Sierra de Grazalema, Sierra del Pinar	1294	-5.39333	36.7664	18.4.2009	B. Frajman	IB	12517	12517	1.43795	0.0400963	3	OL640158	1			2
9	12526	Euphorbia nicaeensis	Euphorbia nicaeensis	Spain	Mallaga: Sierras de Tejeda, Almijara y Alhama, Sendero de Río Verde (SE of Cerro Martos)	888	-3.73806	36.8556	22.4.2009	B. Frajman	IB	12526	12526	1.43811	0.0224781	3	MK091299	1			2
10	14686	Euphorbia nicaeensis	Euphorbia nicaeensis	Spain	Andalucía: Granada, Ctra. Antigua a Sierra Nevada, Km. 6., aprox. curva cercana al inicio de la Ruta de los Neveros		-3.51689	37.1555		A. Díaz	MA	MA-01-00872311	14686				OL640178
11	14680	Euphorbia nicaeensis	Euphorbia nicaeensis	Spain	Andalucía: Jaén, Mancha Real, Sierra de Mágina, barranco Covatillas	1905	-3.46639	37.7194	13.7.2000	Carrasco	MA	MA-01-00648471	14680				OL640173
12	12535	Euphorbia nicaeensis	Euphorbia nicaeensis	Spain	Almeria: SE of the bridge over the river Río Aguas between the villages El Río de Aguas and Sorbas	332	-2.10972	37.0922	25.4.2009	B. Frajman	IB	12535	12535	1.46553		1		1
13	14683	Euphorbia nicaeensis	Euphorbia nicaeensis	Spain	Castilla y León: Burgos, Tejada: Montes de Cervera, Pico de la Sierra	1270	-3.55639	41.9447	18.7.1989	J. A. Alejandre Sáenz	MA	MA-01-00493606	14683				OL640175
14	14681	Euphorbia nicaeensis	Euphorbia nicaeensis	Spain	Castilla y León: Segovia, Cedillo de la Torre	1100	-3.65806	41.4147	13.7.1985	Á. Izuzquiza Ibáñez de Aldecoa	MA	MA-01-00507331	14681				OL640174
15	Riina 1767	Euphorbia nicaeensis	Euphorbia nicaeensis	Spain	Comunidad de Madrid: Along highway A-3 (Madrid-Valencia), between Km 48 and Km 41	590	-3.32297	40.2333	31.5.2008	R. Riina	MICH/IB	Riina 1767	Riina 1767				JN250200
16	14684	Euphorbia nicaeensis	Euphorbia nicaeensis	Spain	Castilla-La Mancha: Cuenca, Belinchón, Cruz de San Marcos	790	-3.05998	40.0537	3.6.1998	G. Hernández Palacios	MA	MA-01-00860841	14684				OL640176
17	14672	Euphorbia nicaeensis	Euphorbia nicaeensis	Spain	Guadalajara: Pelegrina, path along Rio Dulce		-2.62	41.0142	24.11.2015	R. Riina & B. Guzmán.	IB	Riina 1958	14672	1.44144	0.0131505	5		1
18	14671	Euphorbia nicaeensis	Euphorbia nicaeensis	Spain	Cuenca: Ciudad Encantada, surroundings of the town		-2.62	40.2108	23.6.2010	R. Riina & M. Portilheiro	IB	Riina 1874	14671	1.44437	0.0185277	4		1
19	14674	Euphorbia nicaeensis	Euphorbia nicaeensis	Spain	Aragón: Teruel, Sierra de Javalambre	1790	-1.00528	40.1211	2.8.2009	C. Aedo Pérez	MA	MA-01-00790212	14674				OL640167
20	14685	Euphorbia nicaeensis	Euphorbia nicaeensis	Spain	Comunidad Valenciana: Alicante, Alcoi, serra de Mariola, U´Uxola	650	-0.445567	38.7004	21.4.2012	Serra	MA	MA-01-00866279	14685				OL640177
21	14678	Euphorbia nicaeensis	Euphorbia nicaeensis	Spain	Comunidad Valenciana: Alicante, Vall d'Alcalá, S. de Cantacuo, foya Rocha	800	-0.273333	38.77	13.05.1995	Soler	MA	MA-01-00562572	14678				OL640171
22	14675	Euphorbia nicaeensis	Euphorbia nicaeensis	Spain	Comunidad Valenciana: Castellón, Entre Fredes y el Boixar	1000	0.0358333	40.7911	8.6.1999	Güemes	MA	MA-01-00629092	14675				OL640168
23	13367	Euphorbia nicaeensis	Euphorbia nicaeensis	Spain	Tarragona: Serra del Boix: Serra de Cardó, along the road N of Balneari de Cardó (GPS-939)	430	0.573611	40.9606	9.8.2011	B. Frajman & P. Schönswetter	IB	13367	13367	1.34917		1	OL640159	1	1	1
24	11423	Euphorbia nicaeensis	Euphorbia nicaeensis	Spain	Aragón: Huesca, Macizo de la Cotiella: between Ibón d'Armeña and Borda de Bilsé	1400-1600	0.365833	42.51	3.8.2006	B. Frajman & P. Schönswetter	IB	11423	11423				OL640156	1	1	1
25	14822	Euphorbia nicaeensis	Euphorbia nicaeensis	Spain	Huesca: Mt. Cotiella, NW of the village Barbaruéns, along the road to Cotiella	1425	0.375	42.5075	17.7.2017	B. Frajman	IB	14822	14822	1.37462	0.02922	3		1	1	1
26	14702	Euphorbia nicaeensis	Euphorbia nicaeensis	Spain	Catalunya: Lleida, La Noguera, between Balaguer and la Sentiu de Sió, LV-3025a	250	0.851111	41.8025	19.6.2016	P. Carnicero	IB	14702	14702	1.33912	0.012393	3		1
27	13372	Euphorbia nicaeensis	Euphorbia nicaeensis	Spain	Tarragona: Serra de la Pedrera, from Coll de Guix (W of the village Colldejou) to Mt. Miranda (=Mola de Llaberia) (GPS-943)	846	0.863333	41.0944	10.08.2011	B. Frajman & P. Schönswetter	IB	13372	13372	1.36079		1	OL640161
28	13368	Euphorbia nicaeensis	Euphorbia nicaeensis	Spain	Tarragona: Montmell, summit of Mt. Montmell (NW of La Bisbal del Penedès) (GPS-940)	860	1.46667	41.3356	9.8.2011	B. Frajman & P. Schönswetter	IB	13368	13368	1.37397	0.0108875	3	OL640160
29	14819	Euphorbia nicaeensis	Euphorbia nicaeensis	Spain	Catalunya: Mt. Cadí, along the road between the villages Estana and Martinet	1240	1.6675	42.3303	13.7.2017	B. Frajman	IB	14819	14819	1.34326	0.0224753	3	OL640179	1	1	1
30	12594	Euphorbia nicaeensis	Euphorbia nicaeensis	Spain	Catalunya: Barcelona, Manresa, vicinity of Torre Santa Caterina, 0.8 km S of city centre	260	1.82556	41.7178	15.5.2009	A. Hilpold, L. Chamorro	BOZ	AH20092060	12594	1.38721		1
31	13911	Euphorbia nicaeensis	Euphorbia nicaeensis	Spain	Catalunya: Barcelona, Manresa, vicinity of Torre Santa Caterina, 0,8 km S of city centre	260	1.82556	41.7178	15.5.2009	A. Hilpold	IB	AH20092060	13911					1
32	13910	Euphorbia nicaeensis	Euphorbia nicaeensis	Spain	Catalunya: Barcelona, 5 km ENE of Balsareny, 1,3 km S of Cornet	420	1.93333	41.8831	15.5.2009	A. Hilpold	IB	AH20092073	13910				OL640163	1
33	14413	Euphorbia nicaeensis	Euphorbia nicaeensis	Spain	Catalunya: Barcelona, 1 km SE Rupit, next to Salt de Salent waterfall	770	2.47556	42.0153	16.5.2011	A. Hilpold & A. Sanchez-Meseguer	BOZ	PVASC 18880/AH20113026	14413				OL640165
34	15022	Euphorbia nicaeensis	Euphorbia nicaeensis	France	Languedoc-Rousillon: W of the village Moussoulens (NE Alzonne)	170	2.19944	43.2806	10.06.2018	B. Frajman	IB	15022	15022	1.31176	0.00448525	3		1	1	1	2
35	14705	Euphorbia nicaeensis	Euphorbia nicaeensis	France	Languedoc - Roussillon: Nimes, Vergèze, Aire Vergeze-Nord	40	2.96889	42.9511	8.5.2016	P. Carnicero	IB	14705	14705	1.29496	0.0214812	3		1
36	15033	Euphorbia nicaeensis	Euphorbia nicaeensis	France	Languedoc-Rousillon: S of the village Saint-Martin-de-londres	250	3.73833	43.7564	11.06.2018	B. Frajman	IB	15033	15033	1.36327	0.034877	3		1	1	1
37	15043	Euphorbia nicaeensis	Euphorbia nicaeensis	France	Rhône-Alpes: between the villages Saint-Didier-sous-Aubenas and Lavilledieu	250	4.42722	44.5922	14.6.2018	B. Frajman	IB	15043	15043	1.35639	0.030586	3		1	1	1	2
38	15051	Euphorbia nicaeensis	Euphorbia nicaeensis	France	Provence-Alpes-Côte d'Azur: along the road D64 NW of Mazaugues	395	5.895	43.3828	14.6.2018	B. Frajman	IB	15051	15051	1.38771	0.0383313	3		1	1	1
39	14649	Euphorbia nicaeensis	Euphorbia nicaeensis	France	Alpes-de-Haute-Provence: Basses-Alpes, Verdon gorge	770	6.37583	43.7453	2.8.1970	W. Gutermann	Herbarium W. Gutermann	Gutermann 8976	14649				OL640166
40	15061	Euphorbia nicaeensis	Euphorbia nicaeensis	France	Provence-Alpes-Côte d'Azur: Verdon valley, Point Sublime plateu S of Rougon	780	6.39778	43.7931	15.6.2018	B. Frajman	IB	15061	15061	1.36061	0.0231393	3		1	1		2
41	15059	Euphorbia nicaeensis	Euphorbia nicaeensis	France	Provence-Alpes-Côte d'Azur: Vallon de Cuiros 1 km ENE of Jabron	820	6.51222	43.7456	15.6.2018	B. Frajman	IB	15059	15059	1.41077	0.0058599	3		1
42	15058	Euphorbia nicaeensis	Euphorbia nicaeensis	France	Provence-Alpes-Côte d'Azur: Vallon de Cuiros 1 km ENE of Jabron	820	6.51222	43.7456	15.6.2018	B. Frajman	IB	15058	15058	1.45582	0.0213956	3		1
43	15066	Euphorbia nicaeensis	Euphorbia nicaeensis	France	Provence-Alpes-Côte d'Azur: along the road D4 little W of Cabris	615	6.86139	43.6572	15.6.2018	B. Frajman	IB	15066	15066	1.41918	0.0357917	3		1	1	1
44	13399	Euphorbia nicaeensis	Euphorbia nicaeensis	France	Alpes-Maritimes: Alpes Maritimes, S of village l'Escarène (GPS-958)	177	7.34861	43.7894	13.8.2011	B. Frajman & P. Schönswetter	IB	13399	13399	1.31701		1	OL640162	1	1	1
45	14358	Euphorbia adriatica	Euphorbia nicaeensis	Italy	Trentino Alto Adige: Lago di Garda, SE slopes of Monte Brione E of Riva del Garda	150	10.8628	45.8775	24.8.2015	B. Frajman & P. Kirschner	IB	14358	14358	1.10145	0.00575117	3	OL640128	1		1
46	14362	Euphorbia adriatica	Euphorbia nicaeensis	Italy	Lombardia: Lago di Garda, slopes between the villages Salò and San Bartolomeo	260	10.5331	45.6144	25.8.2015	B. Frajman & P. Kirschner	IB	14362	14362	1.09745	0.00989397	3		1	1	1
47	14916	Euphorbia adriatica	Euphorbia nicaeensis	Italy	Veneto: Monte Baldo, between villages Rubiana and Peagne	455	10.7742	45.6164	28.9.2017	B. Frajman	IB	14916	14916	1.17516	0.035567	3	OL640129	1	1	1	2
48	13267	Euphorbia adriatica	Euphorbia nicaeensis	Italy	Veneto: Monte Baldo, NE of Pazzón (NE Caprino Veronese) (GPS-Nr. 894)	561	10.8364	45.6339	6.7.2011	B. Frajman	IB	13267	13267				OL640126	1
49	14925	Euphorbia adriatica	Euphorbia nicaeensis	Italy	Friuli Venezia Giulia: Carso Triestino, 1 km WSW from Bazovica/Basovizza	375	13.8461	45.6381	29.9.2017	B. Frajman	IB	14925	14925	1.1708	0.0379234	3		1
50	14437	Euphorbia adriatica	Euphorbia nicaeensis	Italy	Toscana: Firenze, S foot of Monte Ferrato (Prato)	109	11.0908	43.9111	18.6.2016	B. Frajman & P. Schönswetter	IB	14437	14437	1.12085	0.0103141	3		1	1	1
51	14438	Euphorbia adriatica	Euphorbia nicaeensis	Italy	Toscana: Rosignano Marittimo, slopes of Monte Vaso (NE Póggio Vitalba)	599	10.6139	43.4378	18.6.2016	B. Frajman & P. Schönswetter	IB	14438	14438	1.13334	0.0154929	4		1	1	1	2
52	14445	Euphorbia adriatica	Euphorbia nicaeensis	Italy	Toscana: Siena, foot of the hill of Castello di Capraia NE of Recenza	185	11.2669	43.1875	17.6.2016	B. Frajman & P. Schönswetter	IB	14445	14445	1.1372	0.00320149	3		1
53	14454	Euphorbia adriatica	Euphorbia nicaeensis	Italy	Abruzzo: Gran Sasso, Monti della Lagga E of Assergi	1535	13.5594	42.3939	16.6.2016	B. Frajman & P. Schönswetter	IB	14454	14454	1.14163	0.02416	2		1
54	14351	Euphorbia adriatica	Euphorbia nicaeensis	Italy	Abruzzo: L'Aquila, 1.4 km SE of the village Poggio Picenze	841	13.5583	42.3153	28.8.2015	B. Frajman & P. Kirschner	IB	14351	14351	1.15185	0.0140034	3	OL640127	1	1
55	13205	Euphorbia adriatica	Euphorbia nicaeensis	Italy	Abruzzo: Gran Sasso, along the road Capestrano - Castél del Monte, E of Castelvécchio Calvisio (GPS-Nr. 857)	1000	13.7064	42.3133	27.6.2011	B. Frajman & S. Bogdanović	IB	13205	13205					1
56	13184	Euphorbia adriatica	Euphorbia nicaeensis	Italy	Abruzzo: Montagne del Morrone, along the road Bagnaturo (NNW Sulmona) and Rifugio Casa della Vacche (GPS-Nr. 850)	811	13.9125	42.1192	26.6.2011	B. Frajman & S. Bogdanović	IB	13184	13184	1.18324	0.0311373	2	OL640125	1
57	13191	Euphorbia adriatica	Euphorbia nicaeensis	Italy	Abruzzo: Montagne del Morrone, NW of the forest road Rifugio Casa della Vacche - Monte Morrone (GPS-Nr. 852)	1322	13.9383	42.1183	26.6.2011	B. Frajman & S. Bogdanović	IB	13191	13191	1.1938	0.0231311	2	MK091300	1			2
58	15814	Euphorbia japygica	Euphorbia nicaeensis	Italy	Apulia: 8 km SW of Mariotto	410	16.4831	41.0003	14.7.2019	D. Regele	IB	15814	15814	1.78575		1	OL640146	1	1
59	11772	Euphorbia adriatica	Euphorbia nicaeensis	Slovenia	Primorska: Kras, Kobjeglava - Gabrovica pri Komnu	275	13.7917	45.8117	28.5.2006	B. Frajman & P. Schönswetter	IB	11772	11772				OL640124
60	15508	Euphorbia adriatica	Euphorbia nicaeensis	Slovenia	Kras: Sežana, Štanjel, Kobjeglava - Štanjel	320	13.8333	45.8167	28.7.1998	B. Frajman	IB	15508	15508					1	1
61	13563	Euphorbia adriatica	Euphorbia nicaeensis	Slovenia	Primorska: Kras, meadow NE of Sežana	340	13.8939	45.7194	26.5.2012	B. Frajman	IB	13563	13563	1.108	0.00504312	3		1
62	15509	Euphorbia adriatica	Euphorbia nicaeensis	Slovenia	Kras: Sežana, Sežana - Dol		13.8667	45.7	14.6.2000	B. Frajman	IB	15509	15509					1
63	12228	Euphorbia adriatica	Euphorbia nicaeensis	Slovenia	Primorska: Kras, W of the village Senožeče	550	14.0147	45.7186	4.5.2008	B. Frajman & P. Schönswetter	IB	12228	12228				JN010070	1			2
64	15510	Euphorbia adriatica	Euphorbia nicaeensis	Slovenia	Kras: Divača, Škocjan, near Škocjan cave		14	45.6667	23.6.1999	B. Frajman	IB	15510	15510					1
65	15507	Euphorbia adriatica	Euphorbia nicaeensis	Slovenia	Brkini: Quadrant MTB: 0450/4		14.0333	45.6	27.7.1996	B. Frajman	IB	15507	15507					1
66	14428	Euphorbia adriatica	Euphorbia nicaeensis	Croatia	Istra: Rovinj, Matohanci WSW of the village Brajkovići	170	13.7556	45.1075	14.5.2016	B. Frajman	IB	14428	14428	1.14427	0.0129677	3		1
67	14497	Euphorbia hercegovina	Euphorbia hercegovina	Bosnia and Herzegovina	Bosna: Mt. Zlatar above Konjic	415	17.9678	43.6503	13.7.2016	I. Rešetnik & B. Frajman	IB	14497	14497	1.1548	0.0034232	3		1
68	12135	Euphorbia hercegovina	Euphorbia hercegovina	Bosnia and Herzegovina	Bosna: upper Neretva valley, Konjic: NE of the town	600	17.9706	43.6486	2.11.2007	B. Frajman & P. Schönswetter	IB	12135	12135			1	JN010053	1
69	11752	Euphorbia hercegovina	Euphorbia hercegovina	Bosnia and Herzegovina	Bosnia: valley of R. Neretva, S of village Konjic along the street to špiljane at the junction towards Džajici	290	18.0103	43.6225	25.8.2006	B. Frajman & P. Schönswetter	IB	11752	11752				MF521394
70	1947-0009325; 1947-0009324	Euphorbia hercegovina	Euphorbia hercegovina	Bosnia and Herzegovina	Hercegovina: Mostarsko blato		17.7389	43.3261	11.6.2011		W	9324, 9325	1947-0009325; 1947-0009324					4	3	3
71	1963-0014166	Euphorbia hercegovina	Euphorbia hercegovina	Croatia	Dalmacija: Pelješac, zwischen Felsen und Geröll am Wege: Vipera-Sattel [Sv. Ilija] - Orebić		17.1814	42.9922	16.4.1930	F. J. Widder	W	14166	1963-0014166					1
72	14648	Euphorbia hercegovina	Euphorbia hercegovina	Croatia	Dalmacija: Pelješac, S slopes of Mt. Sutvara above the street ca. 3 km NW of Trstenik	370	17.37	42.9431	21.4.1981	W. Gutermann	Herbarium W. Gutermann	Gutermann 15016	14648				MF521396	1
73	12136	Euphorbia hercegovina	Euphorbia hercegovina	Croatia	Dalmacija: Pelješac peninsula, N of the road over the saddle between Trstenik and Piavičino	380	17.3708	42.9428	2.11.2007	B. Frajman & P. Schönswetter	IB	12136	12136	1.07632	0.0120094	2	MF521395
74	1932-0005511	Euphorbia hercegovina	Euphorbia hercegovina	Croatia	Dalmacija: Pelješac, bei Pijavičino über Trstenik, kalk	400	17.3708	42.9428	12.5.1931	J. Baumgartne	W	5511	1932-0005511					1
75	2002-0006030	Euphorbia hercegovina	Euphorbia hercegovina	Croatia	Dalmacija: Pelješac, Strassensattel zwischen Trstenik und Potomje am Nordfuss des Berges Čučin, 400m. Felsfluren und Zwergstrauchheiden		17.3651	42.9309	16.4.1979	E. Vitek	W	06030	2002-0006030					1
76	1955-0006657	Euphorbia hercegovina	Euphorbia hercegovina	Croatia	Dalmacija: Ragusa [Dubrovnik]: Im Schotter des Weges am Kamme des Mte. Sergio [Srđ]	350	18.1128	42.6456	26.5.1926	E. Korb	W	6657	1955-0006657					3
77	12392	Euphorbia hercegovina	Euphorbia hercegovina	Bosnia and Herzegovina	Republika Srpska: mountain range Leotar N of Trebinje, SE slope of Mt. Gljiva, along the road to the summit	646	18.3844	42.7256	18.9.2008	B. Frajman & P. Schönswetter	IB	12392	12392	1.06685		1	OL640144	1		1	2
78	13777	Euphorbia hercegovina	Euphorbia hercegovina	Bosnia and Herzegovina	Hercegovina: Bijela gora, surroundings of the spring Madžarska ćesma in the village Skočigrm (GPS 1238)	369	18.4944	42.695	31.7.2013	B. Frajman, P. Schönswetter & M. Falch	IB	13777	13777	1.08945	0.00364614	3	OL640145	1	1		2
79	1947-0009333; 1947-0009334; 1947-0009335	Euphorbia hercegovina	Euphorbia hercegovina	Montenegro	Krivošije: Dragalj		18.6833	42.5981	19.6.2006		W	9333, 9334, 9335	1947-0009333; 1947-0009334; 1947-0009335					5
80	13875	Euphorbia erythrodon	Euphorbia erythrodon	Turkey	Anatolia: Mt Sultan Daği	2050	31.3342	38.265	12.06.2012	M. Niketić, M. Jovanović	BEO/IB	BEO-201206/13 // 13875	13875	0.705073	0.0109049	2	OL640130	1			2
81	13876	Euphorbia macroclada	Euphorbia macroclada	Turkey	Anatolia: Eskişehir	882	30.4481	39.7531	10.06.2012	M. Niketić, M. Jovanović	BEO/IB	BEO-201206/14 // 13876	13876	1.02115	0.0161314	2	OL640147	1			2
82	1975-0023617	Euphorbia macroclada	Euphorbia macroclada	Turkey	Dikmen: Türkei: Dikmen südl. Ankara, 1000-1300 m	1000-1300	32.7985	39.8582	7.9.1954	W. Auner	W	23617	1975-0023617					1		1
83	14690	Euphorbia macroclada	Euphorbia macroclada	Turkey	Nevsehir: pr. Göreme, fondo del valle del río Amar (Ask Vadisi)	1080	34.8219	38.6633	4.7.2001	M. Garmendia	MA	MA-01-00688824	14690				OL640155
84	1961-0014985	Euphorbia macroclada	Euphorbia macroclada	Syria	Antilibanon: Syria: Antilibanon. 8km a Damaskus occidentem versus, Zementfabrik		36.5596	33.9699	25.5.1957	K. H. Rechinger	W	14985	1961-0014985					1
85	1962-0012672	Euphorbia macroclada	Euphorbia macroclada	Syria	Damaskus: 25km W from Damaskus		36.213	33.5054	2.6.1961	F. Kasy	W	12672	1962-0012672					1	1
86	M-0307616	Euphorbia macroclada	Euphorbia macroclada	Jordan	Desertum Syriscum: Jordan (Transjordania): Desertum Syriacum, inter Amman et Rutba		36.3001	31.9554	27.5.1957		M	M-0307616	M-0307616					1
87	M-0307630	Euphorbia macroclada	Euphorbia macroclada	Turkey	Sivas: Turcia: Sivas: in saxosis calc. 18km W Gürün versus Kayseri, 1700 m	1700	37.2268	38.7051	25.7.1974		M	M-0307630	M-0307630					1	1	1
88	M-0307629	Euphorbia macroclada	Euphorbia macroclada	Turkey	Anatolia: Koldere, Koldere [Türkei, Anatolien, Prov. Malatya (B 7), Kreis Doğanyol], wenig nordwestlich Koldere Köyü, ca 1 km östlich Poyraz, 38°17'35''N 38°56'16''E, Höhe ca 750 m, steinige Böschungen in lichter Aprikosenplantage, u.a. zusammen mit Carthamus dentatus subsp. dentatus, C. glaucus subsp. glaucus, Picnomon acarna, Echinops pungens, E. spinosissimus subsp. bithynicus, 18. August 1999.	750	38.9378	38.2931	1998-1999	F. Shuhwerk	M	M-0307629	M-0307629					1	1	1
89	M-0307612	Euphorbia macroclada	Euphorbia macroclada	Turkey	Anatiolia: Türkei: Munzur-Gebirge (zentrales Ostanatolien)		39.4452	39.1882	1971	H. Thoma	M	M-0307612	M-0307612					1	1
90	13933	Euphorbia macroclada	Euphorbia macroclada	Turkey	Erzincan: between villages Mertekli and Demirpinar SE of Erzincan	1165	39.77	39.6389	20.4.2010	M. Hofbauer & C. Gilli	IB	13933	13933	1.19444		1	MK091301	1			2
91	14019	Euphorbia macroclada	Euphorbia macroclada	Turkey	Erzurum: İspir, Çoruh river valley, Roadside on D050 between İspir and Yedigöze köyü; about 1.4 km N İspir (GPS-23)	1165	40.4964	41.0006	25.6.2014	B. Frajman, Ch. Gilli, M. Falch & P. Schönswetter	IB	14019	14019	1.09809	0.0173722	2	OL640149	1			2
92	13932	Euphorbia macroclada	Euphorbia macroclada	Turkey	Erzurum: between villages Gölbaşi and Altinçanak, SW of the lake Tortum Gölü	1030	41.5867	40.5875	19.4.2010	R. Flatscher, D. Reich, M. Hofbauer & C. Gilli	IB	13932	13932				OL640148	1
93	14022	Euphorbia macroclada	Euphorbia macroclada	Turkey	Erzurum: Olur, Barhal river valley (Çoruh tributary), Roadside on D060 near Yeşilbağlar köyü (GPS-27)	995	42.1167	40.7761	26.6.2014	B. Frajman, Ch. Gilli, M. Falch & P. Schönswetter	IB	14022	14022	1.09718	0.00353001	2		1	1
94	14060	Euphorbia macroclada	Euphorbia macroclada	Turkey	Batman: Gercüş, Roadside on D955 between Midyat and Gercüş; about 2.1 km ESE Gercüş (GPS-72)	1090	41.3619	37.5619	29.6.2014	B. Frajman, Ch. Gilli, M. Falch & P. Schönswetter	IB	14060	14060	1.17163	0.0145281	3	OL640151	1	1		2
95	14048	Euphorbia macroclada	Euphorbia macroclada	Turkey	Van: Muradiye, Roadside on E99 between Çaldıran and Muradiye; about 6 km N Muradiye (GPS-52)	1785	43.7619	39.0442	27.6.2014	B. Frajman, Ch. Gilli, M. Falch & P. Schönswetter	IB	14048	14048	1.12152		1
96	14131	Euphorbia macroclada	Euphorbia macroclada	Turkey	Van: Muradiye, Roadside on E99 between Çaldıran and Muradiye; about 6 km N Muradiye (GPS-52)	1785	43.7619	39.0442	27.6.2014	B. Frajman, Ch. Gilli, M. Falch & P. Schönswetter	IB	14131	14131	1.11795	0.0237302	2	OL640152	1
97	1991-0004683	Euphorbia macroclada	Euphorbia macroclada	Turkey	Muradiye: Dtandort: stehendes Gewässer	1800	43.7307	38.9825	12.8.1983	F. Sorger	W	4683	1991-0004683					1	1	1
98	14049	Euphorbia macroclada	Euphorbia macroclada	Turkey	Van: Gevaş, Surroundings of Lake Van, Lake Van (Van Gölü); lakeside on small peninsula between Akdamar and Gevaş; about 5 km WNW Gevaş (GPS-53)	1660	43.0572	38.3147	28.6.2014	B. Frajman, Ch. Gilli, M. Falch & P. Schönswetter	IB	14049	14049	1.2254	0.00503654	3	OL640150	1			2
99	M-0307611	Euphorbia macroclada	Euphorbia macroclada	Iraq	Hakari: Mosul, Iraq: Distr. Mosul (Kurdistan). Ad confines Turciae prov. Hakari, inter Mosul et Zakho		42.6532	37.0633	2.7.1957		M	M-0307611	M-0307611					1	1	1
100	1961-0014996	Euphorbia macroclada	Euphorbia macroclada	Iraq	Hakari: Zawita, Iraq: Distr. Mosul (Kurdistan). Ad confines Turciae prov. Hakari, inter Dohuk et Amadiya. Zawita, 21km a Dohuk orientem versus, in pinetis (P. brutia) saxosis, substr. dolomit., ca. 800m	800	43.2233	36.897	10.7.1957	K. H. Rechinger	W	14996	1961-0014996					1	1
101	1968-0017102	Euphorbia macroclada	Euphorbia macroclada	Iran	Kurdistan: Kurdistan, Pass between Rezaiyeh and Shahpur: dry E and W facing slopes: gritty clay over granite	2070	44.9406	38.0083	20.8.1966	J. C. Archibald	W	17102	1968-0017102					1	1
102	1981-0005150	Euphorbia macroclada	Euphorbia macroclada	Iran	E Azerbaijan: Persia, Prov. Azerbaijan orient.: in declivibus siccis inter Sufian et Shabestar, 1400 m	1400	45.6862	38.1744	22.7.1971	K. H. Rechinger	W	5150	1981-0005150					1	1	1
103	M-0307622	Euphorbia macroclada	Euphorbia macroclada	Iran	W Azerbaijan: Urmieh, Province W Azarbaijan: Urumieh, about 5km after Ghoushchi village, W slopes of Ghoushchi mountain (ca. 46km to Salmas)	1352	45.7819	38.0189	26.6.2009	S. Zarre, Y. Salmaki & H. Moazzeni	M	M-0307622	M-0307622					1
104	14262	Euphorbia macroclada	Euphorbia macroclada	Iran	West Azerbaijan: Urmia, half-way between the town Urmia and the village Talebin	1475	44.91	37.61	29.6.2015	B. Frajman	IB	14262	14262	1.08213	0.0150062	3		1
105	14263	Euphorbia macroclada	Euphorbia macroclada	Iran	West Azerbaijan: Urmia, Jermy Valley W of the village Barde-Sour (3 km NW of the village Silvana)	1600	44.8242	37.4372	29.6.2015	B. Frajman	IB	14263	14263	1.05441	0.000674535	2	OL640154	1			2
106	M-0307617	Euphorbia macroclada	Euphorbia macroclada	Iraq	Kirkuk: Iraq: Distr. Kirkuk (Kurdistan): in collibus arenaceis, 10-18km a Kirkuk orientem versus, ca. 500 m		44.4873	35.4615	13.6.1957		M	M-0307617	M-0307617					1
107	1956-0006317	Euphorbia macroclada	Euphorbia macroclada	Iran	Kurdistan: Persia: Saheb pres de Saghez (Kurdistan), 1500 m	1500	46.3866	36.2048	14.8.1955	Remaudière	W	6317	1956-0006317					1	1	1
108	M-0307620	Euphorbia macroclada	Euphorbia macroclada	Iran	Kurdistan: Persia: W: Kurdistan: Kowleh 65km N Sanandaj versus Divandarreh, 1950 m	1950	47.0753	35.8059	29.6.1974		M	M-0307620	M-0307620					1
109	14249	Euphorbia macroclada	Euphorbia macroclada	Iran	Kordistan: along the road Saqqez-Sanandaj, 20 km S of the village Divandarreh	2015	47.09	35.7478	30.5.2015	P. Schönswetter	IB	14249	14249	1.15911		1	OL640153	1			2
110	M-0307625	Euphorbia macroclada	Euphorbia macroclada	Iran	Karmanshah: prov. Kermanshah: 5km after Tazehabad toward Javanrud, after Ghelgheleh village	1200	46.1822	34.7133	23.6.2009	S. Zarre, Y. Salmaki & H. Moazzeni	M	M-0307625	M-0307625					1	1
111	1968-0017098	Euphorbia macroclada	Euphorbia macroclada	Iran	Kurdistan: Kurdistan, E. of Hamadan: exposed level terrain in clay or granite sand among Hulthemia: greenish yellow bracts: glaucous leaves: perrenial	1830	47.6642	35.5153	9.7.1966	J. C. Archibald	W	17098	1968-0017098					1	1	1
112	1977-0000873	Euphorbia macroclada	Euphorbia macroclada	Iran	Hamedan: Sandy stony mountain east slope, flowers yellow, fruits green.	2300	48.45	34.7777	18.7.1974	M. Assadi	W	00873	1977-0000873					1	1	1
113	M-0307618	Euphorbia macroclada	Euphorbia macroclada	Iran	Hamadan: Prov. Hamadan: 13 km on the road of Nahavand-Kangavar, sandy soil toward mountain W side of the road	1550	48.0057	34.4166	22.6.2009	S. Zarre, Y. Salmaki & H. Moazzeni	M	M-0307618	M-0307618					1	1
114	1956-0009678	Euphorbia macroclada	Euphorbia macroclada	Iran	Luristan: Rudak, prov. Luristan: Ad stationem viae ferrae Rudak inter Darband et Dorud		49.7319	33.3966	13.7.1948	K. H. Rechinger	W	9678	1956-0009678					1	1	1
115	14091	Euphorbia petrophila	Euphorbia petrophila	Turkey	Gümüşhane: Kelkit, Roadside between Erzincan and Yarbaşı Köyü; about 4.7 km NE Mecidiye Köyü (GPS-104)		39.5575	39.8731	01.07.2014	B. Frajman, Ch. Gilli, M. Falch & P. Schönswetter	IB	14091	14091	0.708828	0.0112877	3	OL640180				2
116	14077	Euphorbia petrophila	Euphorbia petrophila	Turkey	Erzurum: Çat, Roadside on D950 between Bingöl and Erzurum; about 8.5 km SE Çirişli Köyü (GPS-84)	2310	41.0394	39.4739	30.6.2014	B. Frajman, Ch. Gilli, M. Falch & P. Schönswetter	IB	14077	14077	1.52822	0.0211736	4					2
117	15263	Euphorbia glareosa	Euphorbia glareosa	Austria	Wien: "Johannesberg", 0.4 km WSW Unterlaa	200	16.4158	48.1306	5.12.2018	P. Schönswetter	IB	15263	15263	0.705367	0.00456172	3		1			2
118	11100	Euphorbia glareosa	Euphorbia glareosa	Austria	Wien: "Johannesberg", 0.4 km WSW Unterlaa	200	16.4158	48.1306	13.05.2006	B. Frajman & P. Schönswetter	IB	11100	11100				JN010050
119	11724	Euphorbia glareosa	Euphorbia glareosa	Serbia	Vojvodina: Fruška Gora, N of village Sremska Mitrovica: NE surroundings of the village Grgurevci	220	19.6681	45.11	12.08.2006	B. Frajman & P. Schönswetter	IB	11724	11724				OL640132	1	1
120	15170	Euphorbia glareosa	Euphorbia glareosa	Serbia	Vojvodina: S of the village Neradin	180	19.9031	45.1078	12.09.2018	B. Frajman	IB	15170	15170	0.72876	0.00413603	3		1			2
121	12396	Euphorbia glareosa	Euphorbia glareosa	Bosnia and Herzegovina	Republika Srpska: NW of Višegrad, along the road to Sjemeći, just above Višegrad	516	19.2706	43.7903	19.9.2008	B. Frajman & P. Schönswetter	IB	12396	12396	0.709912	0.00439092	3	MK091298				2
122	11358	Euphorbia glareosa	Euphorbia glareosa	Serbia	E Serbia: footpath from the village Rtanj to the summit of Mt. Rtanj (S of village Lukovo)	c. 1000-1560	21.8917	43.775	29.6.2006	B. Frajman & P. Schönswetter	IB	11358	11358				OL640131	1	1
123	15772	Euphorbia glareosa	Euphorbia glareosa	Serbia	SE Serbia: Rtanj, along the path from the village Rtanj to the summit	1220	21.8942	43.77	28.6.2019	B. Frajman	IB	15772	15772	0.69904	0.00147489	3	OL640143	1	1	1
124	13879	Euphorbia glareosa	Euphorbia glareosa	Serbia	East Serbia: Rtanj		21.88	43.7	01.06.2011	Lakušić D., Vukojičić S., Kuzmanović N., Jakovljević K., Kabaš E.	BEOU/IB	BEOU32058/13879	13879	0.666619	0.0279772	3		1
125	14753	Euphorbia glareosa	Euphorbia glareosa	Macedonia	Čučer Sandevo: between Skopje (Vizbegovo) and the village Mirkovci (N of Skopje)	394	21.4111	42.0658	23.6.2017	B. Frajman	IB	14753	14753	1.77056	0.0277793	3	OL640142	1	1	1	2
126	14745	Euphorbia glareosa	Euphorbia glareosa	Macedonia	Kumanovo: 2 km SE of Kumanovo	315	21.7444	42.1244	22.6.2017	B. Frajman	IB	14745	14745	0.706645	0.00675008	3	OL640141	1	1	1
127	14608	Euphorbia glareosa	Euphorbia glareosa	Ukraine	Odessa: Ananyiv, Kokhanivka	102	30.0453	47.6089	31.7.2015	E. Zaveská & P. Kirschner	IB	14608	14608	0.701756	0.00862394	2
128	14609	Euphorbia glareosa	Euphorbia glareosa	Ukraine	Odessa: Krasni Okny, Hill S of Rosivka (Rozivka)	88	29.3381	47.4539	31.7.2015	E. Zaveská & P. Kirschner	IB	14609	14609	1.25678	0.00484238	3	OL640135
129	14610	Euphorbia glareosa	Euphorbia glareosa	Moldova	Causeni: N Causeni, Hill close to R30	123	29.2525	46.7672	1.8.2015	E. Zaveská & P. Kirschner	IB	14610	14610	0.711694	0.014249	3	OL640136				2
130	14198	Euphorbia glareosa	Euphorbia glareosa	Ukraine	Odessa: village Vasylivka NW of Odessa	60	30.2972	46.6114	30.3.2015	B. Frajman & P. Schönswetter	IB	14198	14198	0.718481	0.012304	3	OL640134				2
131	14636	Euphorbia glareosa	Euphorbia glareosa	Romania	Constanta: Podisul Dobrogei, Cheia, Rez. Cheia		28.4214	44.4992	26.6.2016	I. Rešetnik, S. Bogdanović, Buzurević, S. Đurović	IB	14636	14636	1.04725	0.0101501	3		1	1	1	2
132	14637	Euphorbia glareosa	Euphorbia glareosa	Romania	Constanta: Podisul Dobrogei, between Targusor and Gura Dobrogei		28.4706	44.4669	26.6.2016	I. Rešetnik, S. Bogdanović, Buzurević, S. Đurović	IB	14637	14637	0.725955	0.0199376	2		1	1	1
133	15205	Euphorbia glareosa	Euphorbia glareosa	Bulgaria	Dobrich: Vidno-Neykovo	80	28.4072	43.5733	19.5.2018	E. Kabaš, S. Vukojičić	IB	15205	15205	0.72128	0.00381352	3
134	15834	Euphorbia glareosa	Euphorbia glareosa	Bulgaria	Dobrich: Kamen Bryag	30	28.5569	43.4547	1.6.2019	C. Maylandt	IB	15834	15834	0.716583	0.004682	5		1	1	1
135	15833	Euphorbia glareosa	Euphorbia glareosa	Bulgaria	Varna: Varna-Vaglen	332	27.8803	43.2622	31.5.2019	C. Maylandt	IB	15833	15833	0.698601	0.00285046	3		1
136	14642	Euphorbia glareosa	Euphorbia glareosa	Turkey	European Turkey: Tekirdagh, between Inecik and Malkara	190	26.9111	40.8822	28.6.1984	K. H. Rechinger	WU	K. H. Rechinger, Iter turcicum 1984, WU 004695_61030	14642				OL640137
137	1969-0005440	Euphorbia glareosa	Euphorbia glareosa	Turkey	Malkara: Vorberge im N des Ganos Dag, 5km S Alaybey SE Malkara		27.2675	40.7829	5.5.-8.6.1968	K. Bauer	W	5440	1969-0005440					1
138	14689	Euphorbia glareosa	Euphorbia glareosa	Turkey	Bay: Bayramic Evciler, Mt. Ido, Gavur geldi	840	26.8	39.7333	19.6.2001	S. Castroviejo Bolíbar	MA	MA-01-00689606	14689				OL640140
139	14688	Euphorbia glareosa	Euphorbia glareosa	Turkey	Bal: entre Kütahya y Bozüyük, Kovran	970	30.15	39.6333	21.6.2001	S. Castroviejo Bolíbar	MA	MA-01-00689028	14688				OL640139
140	14110	Euphorbia glareosa	Euphorbia glareosa	Turkey	Kütahya: Altintas, ca. 5 km WSW of Altintas	1032	30.0939	39.0522	9.7.2014	M. Falch	IB	14110	14110	1.43678	0.0163075	3		1	1	1	2
141	1991-0004702	Euphorbia glareosa	Euphorbia glareosa	Turkey	65km S Bartin (60km E Zonguldak), trockene Weide	500	32.2659	41.3648	21.8.1983	P. Buchner	W	4702	1991-0004702					1	1	1
142	13637	Euphorbia glareosa	Euphorbia glareosa	Armenia	Aragatsotn: southern foothills of Mt. Aragats, between the villages Agarak and Bjurakan	1244	44.2681	40.3153	26.7.2012	P. Schönswetter & B. Frajman	IB	13637	13637	1.13307	0.00493817	3	OL640133	1	1	1	2
143	K. Rechinger 39198	Euphorbia glareosa	Euphorbia glareosa	Iran	West Azerbaijan: Maku,		44.5131	39.7961	5.5.1971		W	K. Rechinger 39198	K. Rechinger 39198				LN680643
144	12477	Euphorbia glareosa	Euphorbia glareosa	Russia	Voronesh Oblast: S Boguchar, S Novonhkolsk, "Chipunovskeija Steppe"	228	40.4042	49.5908	5.7.2008	M. M. Wernisch	WHB	Wernisch 47896	12477				JN010103				1
145	14687	Euphorbia glareosa	Euphorbia glareosa	Russia	Regio Volgae Inferioris, vallis fluvii Stscherbatovka, prov. Volgograd	0	44.7333	48.4	6.6.1992	Sagalaev	MA	MA-01-00561604	14687				OL640138
OUTGROUP
O1	13181	E. barrelieri	E. barrelieri	Italy	Puglia, Gargano, along the road Monte Sant' Angelo - Vico del Gargano, S of Casa Impiombato (GPS-Nr. 849)	682	15.945	41.7281	25.6.2011	B. Frajman & S. Bogdanović	IB	13181	13181				MF521406				2
O2	12421	E. barrelieri	E. barrelieri	Italy	Toscana: Province Grosetto, Torrente Trasubbie	24	11.3261	42.7864	11.07.2008	F. Frignani	IB	12421	12421								2
O3	14069	E. cheiradenia	E. cheiradenia	Turkey	Bingöl: Genç, Roadside on D950 between Diyarbakır and Bingöl; about 1.3 km E Şehitköy (GPS-78)	1315	40.5081	38.6878	30.6.2014	B. Frajman, Ch. Gilli, M. Falch & P. Schönswetter	IB	14069	14069								2
O4	15267	E. humilis	E. humilis	Kyrgyzstan	Talas: northern slope of Talas Mt. R., Arabik River valley (Kurkureu River basin)		71.0167	42.3667	15.6.1988	Klyuykov, Vasileva, Kashkaraeva	FRU	s.n.	15267								2
O5	12076	E. kerneri	E. kerneri	Italy	Friuli Venezia Giulia, Alpi Giulie, Rivoli Bianchi S of Venzone	260	13.1322	46.3167	01.06.2007	B. Frajman & P. Schönswetter	IB	12076	12076				JN010058
O6	11188	E. kerneri	E. kerneri	Italy	Belluno: Alpi Carniche, Passo della Màuria: eastern slope of M. Miaron	1400	12.5097	46.4456	09.09.2006	Božo Frajman & Peter Schönswetter	IB	11188	11188								2
O7	14294	E. kopetdaghi	E. kopetdaghi	Iran	North Khorasan: Kopet Dag, 3 km N of the village Qush Tappeh (WNW of Raz)	1170	56.9972	37.9869	20.5.2015	B. Frajman, M. Falch & Ch. Gilli	IB	14294	14294								2
O8	14673	E. matritensis	E. matritensis	Spain	Madrid: between Moraleja de Enmedio and Arroyomolinos SW of Madrid	640	-3.89167	40.2597	20.4.2017	B. Frajman, G. Nieto Feliner, R. Riina	IB	14673	14673								2
O9	14414	E. minuta	E. minuta	Spain	Catalunya: Tarragona, 5 km W Montblanc, Mirador de la Pena	950	1.09333	41.3569	8.5.2010	A. Hilpold, L. Barres, M. Sanz, I. Sanchez, K. Romashchenko	BOZ	PVASC 18695/AH20102106	14414								2
O10	11242	E. niciciana	E. niciciana	Serbia	E Serbia, Majdanpek	500	21.9558	44.4411	20.6.2006	B. Frajman & P. Schönswetter	IB	11242	11242				JN009972
O11	14577	E. niciciana	E. niciciana	Greece	Epirus - Western Macedonia, Epirus, Road between Konitsa and Elefthero, ca. 7.5 km E of Konitsa	893	20.8331	40.0678	17.7.2014	P. Kirschner	IB	14577	14577								2
O12	14579	E. niciciana	E. niciciana	Bulgaria	Blagoevgrad, Sandanski, 0.3 km NE of Rojen Monastery, 3.6 km ENE of Melnik	544	23.4336	41.5325	23.7.2014	P. Kirschner	IB	14579	14579								2
O13	13937	E. niciciana	E. niciciana	Turkey	Samsun, delta of the river Kızılırmak Nehri, delta of the river Kızılırmak Nehri N of Bafra	4	35.9144	41.6467	25.4.2010	M. Hofbauer & C. Gilli	IB	13937	13937								2
O14	14254	E. polycaula	E. polycaula	Iran	Hamedan: along the road Arak-Khomein, SE of the village Emamzadeh Varche	2070	49.9547	33.7881	01.06.2015	P. Schönswetter	IB	14254	14254								2
O15	11103	E. saxatilis	E. saxatilis	Austria	Niederösterreich, Nördliche Kalkalpen, SW-Flanke der Hohen Mandling 0.35 km NNW des Bahnhofes Reichenthal	450	16.0047	47.88	19.5.2006	B. Frajman & P. Schönswetter	IB	11103	11103				MF521393				2
O16	12074	E. saxatilis	E. saxatilis	Austria	Niederösterreich, Alpen-Ostrand, Hauerberg (W Bad Vöslau): 0.35 km WNW des Gipfels	460	16.1564	47.9767	19.5.2007	B. Frajman & P. Schönswetter	IB	12074	12074								2
O17	14556	E. seguieriana subsp. armeniaca	E. seguieriana subsp. armeniaca	Armenia	Syunik, Alvank, South Armenia, Alvank (Aldara): dry steppe slope near small path ca 3,8 km NNW of the village centrum	1210	46.3417	38.9683	6.5.2014	L. Ekrt	IB	14556	14556								2
O18	13726	E. seguieriana subsp. armeniaca	E. seguieriana subsp. armeniaca	Georgia	Mtskheti-Mtianeti, southern slope of Skhalti mountain range, along the street from Mtskheta to the Shio-mghvime monastery, ca. 8km NNW of Mtskheta	609	44.7044	41.8494	9.7.2012	B. Frajman & P. Schönswetter	IB	13726	13726								2
O19	11095	E. seguieriana subsp. seguieriana	E. seguieriana subsp. seguieriana	Austria	Niederösterreich, Hainburger Berge, SW-Flanke des Braunsberges	300	16.9522	48.1525	14.5.2006	B. Frajman & P. Schönswetter	IB	11095	11095				JN009998
O20	14558	E. seguieriana subsp. seguieriana	E. seguieriana subsp. seguieriana	Spain	Cataluña, Lleida, 0.7 km W Alos de Balaguer	270	0.952222	41.9117	27.7.2012	A. Hilpold & M. Prahmsohler	BOZ	AH20122014	14558								2
O21	14336	E. seguieriana subsp. seguieriana	E. seguieriana subsp. seguieriana	Germany	Rheinland-Pfalz, Rheintal, Protected area "Mainzer Sand"	130	8.20139	50.015	13.8.2015	B. Frajman & P. Kirschner	IB	14336	14336								2
O22	14179	E. seguieriana subsp. seguieriana	E. seguieriana subsp. seguieriana	Austria	Niederösterreich, Hainburger Berge, Hexenberg, western slope	300	16.9317	48.1244	9.6.2014	P. Schönswetter	IB	14179	14179								2
O23	13091	E. seguieriana subsp. seguieriana	E. seguieriana subsp. seguieriana	Hungary	NW of Budapest, little N of Pilisjászfalu, S foothill of Vörös-oldal ["red hill"]		18.7903	47.6614	01.06.2010	K. Bardy & M. Kropf	IB	13091	13091								2
O24	14607	E. seguieriana subsp. seguieriana	E. seguieriana subsp. seguieriana	Ukraine	Ternopil, Pidvolochysk, Gorodnitsa	376	26.0831	49.3961	28.7.2015	E. Zaveská & P. Kirschner	IB	14607	14607								2
O25	14564	E. seguieriana subsp. seguieriana	E. seguieriana subsp. seguieriana	Kazakhstan	Aktobe, Petropavlovka, N of Aktobe, along route to Alimbetovka, N-shore of Kargalinskoe storage lake, steppe hills & lakeshore	306	57.7786	50.6403	2.8.2014	A. Hilpold, B. Frajman & P. Schönswetter	IB	14564	14564								2
O26	11312	E. thessala	E. thessala	Bulgaria	Staro Selo S from Pernik: E from the road Staro Selo - Studena	820	23.1339	42.4928	27.6.2006	B. Frajman & P. Schönswetter	IB	11312	11312				JN010029
O27	14770	E. thessala	E. thessala	Greece	Pellis: between villages Periklia and Notia	573	22.2364	41.1025	25.6.2017	B. Frajman	IB	14770	14770								2
O28	14759	E. thessala	E. thessala	Macedonia	Dolneni: Mt. Treskavec, little SW bellow the monastery (NW of Prilep)	1159	21.5336	41.4014	24.6.2017	B. Frajman	IB	14759	14759								2
O29	11131	E. triflora	E. triflora	Slovenia	Primorska, Trnovski gozd, Caven, "Bavcarjevo zavetisce na Cavnu" hut - Mala gora	1070	13.8544	45.9244	27.5.2006	B. Frajman & P. Schönswetter	IB	11131	11131				JN010107				2
O30	12065	E. triflora	E. triflora	Croatia	Velebit: Veliki Sadikovac S of Baške Oštarije, SSE slopes	1260	15.1875	44.5042	28.4.2007	Božo Frajman & Peter Schönswetter	IB	12065	12065								2
